# Supplementary material for: VirPool: model-based estimation of SARS-CoV-2 variant proportions in wastewater samples
Source: Springer Nature journal article supplement (doi:10.1186/s12859-022-05100-3), 2022-12-19
Supplement: 12859_2022_5100_MOESM1_ESM.pdf [file 12859_2022_5100_MOESM1_ESM.pdf]

# VirPool: Model-Based Estimation of SARS-CoV-2 Variant Proportions in Wastewater Samples

## Supplementary Tables and Figures

Table S1: (a) Overview of single-patient clinical samples used in synthetic mixtures. (b) Composition of synthetic mixtures and parameters of VirPool analysis. (c) Overview of wastewater samples.

This table is in the attached supplementary file 1.

Table S2: Eight single-patient samples mixed in the in vitro mixture. The dilution of each sample was computed based on the C<sub>q</sub> value from RT-qPCR. Among mutations discovered in individual samples we have selected those that are specific to a single of these eight samples, and we report their count and the median frequency of these mutations in the mixed sample. The two B.1.1.7 samples have only a single unique mutation each, making their estimates less reliable, but their sum agrees well with proportions of mutations characteristic for this variant shown in Table S3).

| Sample ID      | GISAID         | Variant   | C <sub>q</sub> | Dilution | Unique mut. | Freq. |
|----------------|----------------|-----------|----------------|----------|-------------|-------|
| UKBA-1122/2021 | EPI_ISL_959634 | B.1.1.7   | 15.924         | 14.1     | 1           | 0.243 |
| UKBA-1123/2021 | EPI_ISL_959635 | B.1.1.7   | 15.915         | 14.2     | 1           | 0.307 |
| UKBA-1102/2021 | EPI_ISL_959642 | B.1.160   | 16.873         | 7.3      | 24          | 0.084 |
| UKBA-1118/2021 | EPI_ISL_959631 | B.1.258   | 16.292         | 10.9     | 8           | 0.009 |
| UKBA-1108/2021 | EPI_ISL_959649 | B.1.258   | 19.738         | 1.0      | 11          | 0.023 |
| UKBA-1124/2021 | EPI_ISL_959636 | B.1.258   | 16.748         | 7.9      | 10          | 0.129 |
| UKBA-1103/2021 | EPI_ISL_959648 | B.1.258   | 16.348         | 10.5     | 7           | 0.165 |
| UKBA-1105/2021 | EPI_ISL_959647 | B.1.1.170 | 17.681         | 4.2      | 19          | 0.065 |

Table S3: Frequencies of selected alleles in the reads from the in vitro mixed sample. We have selected all alleles which had in our variant profile probability more than 90% in B.1.1.7 and less than 1% in the other variants considered in the analysis, including the background “other” profile. We display the number and fraction of reads containing this allele and the probability in the B.1.1.7 profile. The median allele proportion is 0.524, which agrees well with the Virpool estimate of 53% for B.1.1.7. Most positions have a similar proportion of the B.1.1.7 allele, except for the last one.

| Pos   | Allele | # reads | Frequency in |         |
|-------|--------|---------|--------------|---------|
|       |        |         | reads        | B.1.1.7 |
| 23271 | A      | 12762   | 0.615        | 1.000   |
| 23709 | T      | 12240   | 0.606        | 1.000   |
| 23063 | T      | 12108   | 0.597        | 1.000   |
| 14676 | T      | 39639   | 0.581        | 1.000   |
| 15279 | T      | 38363   | 0.574        | 1.000   |
| 24506 | G      | 11952   | 0.566        | 1.000   |
| 24914 | C      | 11645   | 0.560        | 0.999   |
| 16176 | C      | 11035   | 0.549        | 0.999   |
| 5388  | A      | 24426   | 0.538        | 1.000   |
| 6954  | C      | 10154   | 0.527        | 0.999   |
| 28111 | G      | 31574   | 0.521        | 1.000   |
| 913   | T      | 14904   | 0.502        | 1.000   |
| 3267  | T      | 12638   | 0.489        | 1.000   |
| 28280 | C      | 34572   | 0.487        | 0.998   |
| 27972 | T      | 27369   | 0.486        | 1.000   |
| 28977 | T      | 26171   | 0.486        | 1.000   |
| 28048 | T      | 28749   | 0.484        | 0.998   |
| 28282 | A      | 33981   | 0.477        | 0.998   |
| 28281 | T      | 33260   | 0.445        | 0.998   |
| 11296 | G      | 456     | 0.053        | 0.918   |

Table S4: The estimated proportions in wastewater samples from a plant near Bischofshofen, Austria (federal state of Salzburg) (Amman et al, 2022). Comparison of predictions with VirPool and VaQuERo (Amman et al, 2022). Column “other” for VaQuERo includes lineages B.1.221, B.1.1.232, and B.1.1.153 as well as other unidentified lineages.

| Date       | B.1.1.7 | B.1.160 | B.1.177 | B.1.258 | B.1.351 | other |
|------------|---------|---------|---------|---------|---------|-------|
| VirPool    |         |         |         |         |         |       |
| 18/12/2020 | 0.00    | 0.46    | 0.16    | 0.13    | 0.00    | 0.24  |
| 27/12/2020 | 0.09    | 0.06    | 0.10    | 0.51    | 0.01    | 0.23  |
| 17/01/2021 | 0.52    | 0.28    | 0.09    | 0.02    | 0.00    | 0.08  |
| 03/02/2021 | 0.84    | 0.08    | 0.01    | 0.02    | 0.00    | 0.05  |
| 24/02/2021 | 0.86    | 0.04    | 0.00    | 0.10    | 0.00    | 0.00  |
| VaQuERo    |         |         |         |         |         |       |
| 18/12/2020 | 0.00    | 0.42    | 0.12    | 0.11    | 0.00    | 0.35  |
| 27/12/2020 | 0.20    | 0.15    | 0.00    | 0.41    | 0.00    | 0.24  |
| 17/01/2021 | 0.51    | 0.23    | 0.09    | 0.05    | 0.00    | 0.12  |
| 03/02/2021 | 0.70    | 0.21    | 0.00    | 0.09    | 0.00    | 0.00  |
| 24/02/2021 | 0.94    | 0.00    | 0.00    | 0.00    | 0.00    | 0.06  |

Table S5: Frequencies of selected alleles in the Austrian wastewater sample from February 24, 2021. We have selected all alleles which had in our variant profile probability less than 1% for both B.1.1.7 and B.1.160 and probability at least 25% in B.1.258. We also display the number and fraction of reads containing this allele and the frequencies from these profiles. The first seven rows support a high percentage of B.1.258 variant.

| Pos   | Allele | # reads | Frequency in |         |         |         |
|-------|--------|---------|--------------|---------|---------|---------|
|       |        |         | reads        | B.1.1.7 | B.1.160 | B.1.258 |
| 20268 | G      | 245     | 1.000        | 0.000   | 0.001   | 0.993   |
| 829   | T      | 18060   | 0.315        | 0.001   | 0.001   | 0.273   |
| 18028 | T      | 8005    | 0.304        | 0.000   | 0.001   | 0.789   |
| 17104 | T      | 17743   | 0.288        | 0.000   | 0.002   | 0.996   |
| 23876 | A      | 2007    | 0.272        | 0.000   | 0.000   | 0.298   |
| 22127 | T      | 4922    | 0.230        | 0.000   | 0.000   | 0.300   |
| 25947 | T      | 1922    | 0.171        | 0.000   | 0.001   | 0.298   |
| 12988 | T      | 25      | 0.002        | 0.000   | 0.001   | 0.790   |
| 7767  | C      | 2       | 0.002        | 0.000   | 0.002   | 0.992   |
| 14697 | T      | 18      | 0.001        | 0.000   | 0.000   | 0.281   |
| 22879 | A      | 36      | 0.001        | 0.000   | 0.001   | 0.991   |
| 26972 | C      | 55      | 0.001        | 0.000   | 0.002   | 0.783   |
| 27800 | A      | 26      | 0.001        | 0.000   | 0.001   | 0.849   |
| 28083 | T      | 123     | 0.001        | 0.000   | 0.007   | 0.265   |
| 29734 | C      | 86      | 0.001        | 0.000   | 0.002   | 0.976   |
| 15598 | A      | 0       | 0.000        | 0.000   | 0.002   | 0.790   |
| 16394 | T      | 1       | 0.000        | 0.002   | 0.001   | 0.299   |
| 18176 | T      | 4       | 0.000        | 0.000   | 0.000   | 0.284   |
| 19398 | T      | 0       | 0.000        | 0.000   | 0.004   | 0.297   |
| 20451 | T      | 0       | 0.000        | 0.000   | 0.001   | 0.365   |
| 24910 | C      | 56      | 0.000        | 0.000   | 0.002   | 0.791   |
| 8047  | T      | 0       | 0.000        | 0.000   | 0.001   | 0.993   |

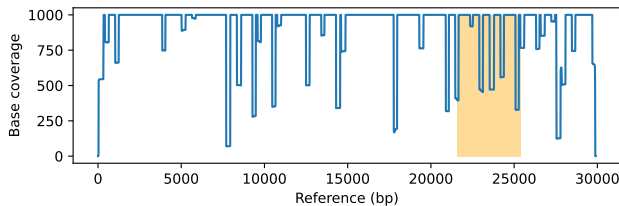

(a) ONT short, clinical sample ERR4868988 (average coverage: 1920, median coverage: 1818)

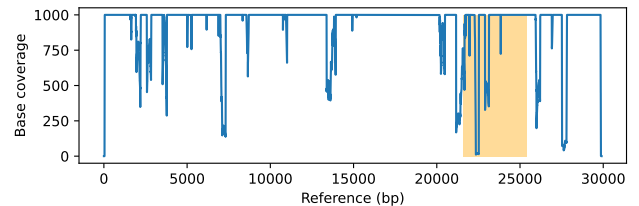

(b) Illumina, clinical sample ERR4839756 (average coverage: 4527, median coverage: 3810)

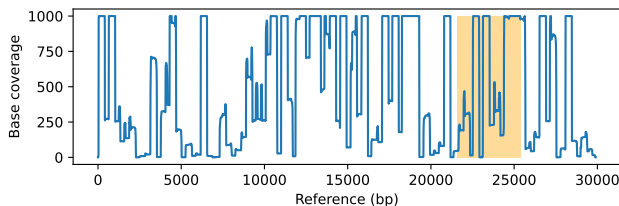

(c) ONT short, wastewater sample SRR15275979, (average coverage: 1057, median coverage: 302)

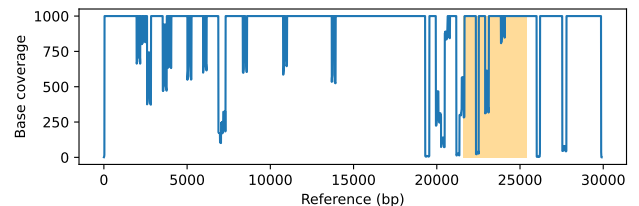

(d) Illumina, wastewater sample CoV-3813-S77797-npa (average coverage: 26223, median coverage: 11579)

Figure S1: Typical coverage along the genome in clinical single-patient and wastewater samples. The y-axis is truncated at coverage of 1000. In wastewater samples, the coverage is much more variable with many regions of extremely low coverage. The Spike gene region, which contains many variant segregating mutations, is highlighted in orange.

Table S6: Frequencies of selected alleles in the Nice wastewater samples from October 2020. We have selected all alleles which had in our variant profile probability less than 1% for both B.1.160 and “other” and probability at least 90% in B.1.1.7. We display the fraction of reads containing each allele in the samples from the five locations where VirPool estimated at least 7% of the Alpha variant. Positions where at least one of the five samples have allele proportion at least 5% are highlighted in boldface.

| Pos          | Allele | Frequency in |           |        |         |           |
|--------------|--------|--------------|-----------|--------|---------|-----------|
|              |        | Fabron       | Madeleine | Harbor | Paillon | East Nice |
| <b>913</b>   | T      | 0.145        | 0.106     | 0.121  | 0.095   | 0.132     |
| 3267         | T      | 0.034        | 0.035     | 0.034  | 0.042   | 0.042     |
| 5388         | A      | 0.000        | 0.000     | 0.009  | 0.000   | 0.009     |
| <b>5986</b>  | T      | 0.062        | 0.000     | 0.006  | 0.014   | 0.022     |
| 6954         | C      | 0.000        | 0.000     | 0.000  | 0.000   | 0.000     |
| 11296        | G      | 0.006        | 0.003     | 0.006  | 0.008   | 0.002     |
| <b>14676</b> | T      | 0.342        | 0.379     | 0.399  | 0.421   | 0.358     |
| <b>15279</b> | T      | 0.121        | 0.163     | 0.212  | 0.179   | 0.114     |
| 16176        | C      | 0.015        | 0.003     | 0.009  | 0.008   | 0.007     |
| <b>23063</b> | T      | 0.000        | 0.333     | 0.000  | 0.000   | 0.000     |
| 23271        | A      | 0.023        | 0.011     | 0.018  | 0.014   | 0.020     |
| <b>23709</b> | T      | 0.028        | 0.000     | 0.078  | 0.060   | 0.152     |
| <b>24506</b> | G      | 0.209        | 0.224     | 0.019  | 0.168   | 0.077     |
| <b>24914</b> | C      | 0.156        | 0.005     | 0.001  | 0.000   | 0.045     |
| <b>27972</b> | T      | 0.062        | 0.000     | 0.037  | 0.037   | 0.027     |
| 28048        | T      | 0.000        | 0.000     | 0.010  | 0.000   | 0.000     |
| 28111        | G      | 0.017        | 0.019     | 0.014  | 0.012   | 0.015     |
| <b>28280</b> | C      | 0.169        | 0.236     | 0.229  | 0.209   | 0.214     |
| <b>28281</b> | T      | 0.158        | 0.214     | 0.208  | 0.185   | 0.194     |
| <b>28282</b> | A      | 0.162        | 0.221     | 0.222  | 0.195   | 0.205     |
| <b>28977</b> | T      | 0.000        | 0.458     | 0.000  | 0.000   | 0.026     |

Table S7: Frequencies of selected alleles in the Nice wastewater samples from March 2021, Harbor location. The top part of the table contains all alleles which had in our variant profile probability less than 1% for B.1.160, B.1.1.7 and “other” and probability at least 90% in B.1.177. Similarly, the bottom part contains all alleles with probability at least 90% in B.1.160 and less than 1% in B.1.177, B.1.1.7 and “other”. We display the count and fraction of reads containing each allele in this sample as well as allele probabilities in these profiles.

| Pos   | Allele | # reads | Frequency in |         |         |         |       |
|-------|--------|---------|--------------|---------|---------|---------|-------|
|       |        |         | reads        | B.1.177 | B.1.160 | B.1.1.7 | other |
| 22227 | T      | 268     | 0.691        | 0.995   | 0.006   | 0.001   | 0.004 |
| 28932 | T      | 6       | 0.085        | 0.996   | 0.002   | 0.000   | 0.001 |
| 6286  | T      | 19      | 0.022        | 0.995   | 0.004   | 0.001   | 0.002 |
| 29645 | T      | 3       | 0.008        | 0.995   | 0.003   | 0.000   | 0.001 |
| 445   | C      | 3       | 0.004        | 0.994   | 0.003   | 0.000   | 0.001 |
| 21255 | C      | 0       | 0.000        | 0.989   | 0.002   | 0.001   | 0.002 |
| 26801 | G      | 0       | 0.000        | 0.979   | 0.003   | 0.000   | 0.001 |
| 26876 | C      | 205     | 0.274        | 0.001   | 0.987   | 0.000   | 0.000 |
| 4543  | T      | 18      | 0.205        | 0.004   | 0.987   | 0.003   | 0.003 |
| 13993 | T      | 2       | 0.105        | 0.001   | 0.990   | 0.000   | 0.000 |
| 16889 | G      | 1       | 0.100        | 0.000   | 0.988   | 0.000   | 0.000 |
| 17019 | T      | 1       | 0.100        | 0.001   | 0.987   | 0.002   | 0.001 |
| 5629  | T      | 3       | 0.088        | 0.001   | 0.962   | 0.000   | 0.001 |
| 15766 | T      | 30      | 0.037        | 0.001   | 0.988   | 0.000   | 0.004 |
| 11497 | T      | 1       | 0.004        | 0.001   | 0.988   | 0.002   | 0.000 |
| 25710 | T      | 0       | 0.000        | 0.001   | 0.988   | 0.001   | 0.002 |
| 28975 | C      | 0       | 0.000        | 0.001   | 0.985   | 0.000   | 0.000 |
| 29399 | A      | 0       | 0.000        | 0.001   | 0.987   | 0.000   | 0.000 |
| 9526  | T      | 0       | 0.000        | 0.001   | 0.989   | 0.000   | 0.001 |

## References

Amman F, Markt R, Endler L, Hupfauf S, Agerer B, Schedl A, Richter L, Zechmeister M, Bicher M, Heiler G, Triska P, Thornton M, Penz T, Senekowitsch M, Laine J, Keszei Z, Klimek P, Nagele F, Mayr M, Daleiden B, Steinlechner M, Niederstatter H, Heidinger P, Rauch W, Scheffknecht C, Vogl G, Weichlinger G, Wagner AO, Slipko K, Masseron A, Radu E, Allerberger F, Popper N, Bock C, Schmid D, Oberacher H, Kreuzinger N, Insam H, Bergthaler A (2022) Viral variant-resolved wastewater surveillance of SARS-CoV-2 at national scale. *Nature Biotechnology* Accepted. Online ahead of print.
